# Supplementary material for: Profiling cancer-associated genetic alterations and molecular classification of cancer in Korean gastric cancer patients
Source: PubMed Central journal article supplement (PMC5642524; doi:10.18632/oncotarget.19435), 2017-07-22
Supplement: oncotarget-08-69888-s001.pdf [file oncotarget-08-69888-s001.pdf]

## Profiling cancer-associated genetic alterations and molecular classification of cancer in Korean gastric cancer patients

### SUPPLEMENTARY MATERIALS

Supplementary Table 1: List of 43 gastric cancer related target gene panel

|                 |              |              |               |              |                 |              |
|-----------------|--------------|--------------|---------------|--------------|-----------------|--------------|
| <i>ACVR1B</i>   | <i>ALK</i>   | <i>APC</i>   | <i>ARID1A</i> | <i>BCOR</i>  | <i>BRAF</i>     | <i>MEDAG</i> |
| <i>C16orf74</i> | <i>CBWD1</i> | <i>CCND1</i> | <i>CCNE1</i>  | <i>CDH1</i>  | <i>CIC</i>      | <i>CR1</i>   |
| <i>CTNNB1</i>   | <i>EGFR</i>  | <i>ERBB2</i> | <i>ERBB3</i>  | <i>FBXW7</i> | <i>FGFR2</i>    | <i>HLA-B</i> |
| <i>IRF2</i>     | <i>JAK2</i>  | <i>KRAS</i>  | <i>LARP4B</i> | <i>MDM2</i>  | <i>MET</i>      | <i>MLH1</i>  |
| <i>MSH2</i>     | <i>MTOR</i>  | <i>MVK</i>   | <i>MYC</i>    | <i>CD274</i> | <i>PDCD1LG2</i> | <i>PGM5</i>  |
| <i>PIK3CA</i>   | <i>PTEN</i>  | <i>RHOA</i>  | <i>SMAD4</i>  | <i>STK11</i> | <i>TP53</i>     | <i>KDR</i>   |
| <i>ZBTB20</i>   |              |              |               |              |                 |              |

**Supplementary Table 2: Overview of all somatic SNVs and indels identified through NGS in GC**

See Supplementary File 1

Supplementary Table 3: Somatic variants of the 43 cancer panel genes in 107 Korean gastric cancers and TCGA data

| Gene            | In this study (n=107) |          | TCGA, nature 2014 (n=289) |          |
|-----------------|-----------------------|----------|---------------------------|----------|
|                 | No of case            | Case (%) | No of case                | Case (%) |
| <i>TP53</i>     | 41                    | 38.3%    | 138                       | 47.8%    |
| <i>ARID1A</i>   | 39                    | 36.4%    | 90                        | 31.1%    |
| <i>CR1</i>      | 16                    | 15.0%    | 21                        | 7.3%     |
| <i>APC</i>      | 12                    | 11.2%    | 42                        | 14.5%    |
| <i>BCOR</i>     | 12                    | 11.2%    | 21                        | 7.3%     |
| <i>CDH1</i>     | 11                    | 10.3%    | 29                        | 10.0%    |
| <i>CIC</i>      | 10                    | 9.3%     | 26                        | 9.0%     |
| <i>PIK3CA</i>   | 10                    | 9.3%     | 57                        | 19.7%    |
| <i>ERBB3</i>    | 9                     | 8.4%     | 31                        | 10.7%    |
| <i>RHOA</i>     | 9                     | 8.4%     | 16                        | 5.5%     |
| <i>ERBB2</i>    | 8                     | 7.5%     | 14                        | 4.8%     |
| <i>CCND1</i>    | 7                     | 6.5%     | 1                         | 0.3%     |
| <i>FBXW7</i>    | 7                     | 6.5%     | 27                        | 9.3%     |
| <i>ALK</i>      | 6                     | 5.6%     | 12                        | 4.2%     |
| <i>KRAS</i>     | 6                     | 5.6%     | 28                        | 9.7%     |
| <i>MTOR</i>     | 6                     | 5.6%     | 23                        | 8.0%     |
| <i>CTNNB1</i>   | 5                     | 4.7%     | 19                        | 6.6%     |
| <i>EGFR</i>     | 5                     | 4.7%     | 15                        | 5.2%     |
| <i>HLA-B</i>    | 5                     | 4.7%     | 20                        | 6.9%     |
| <i>MSH2</i>     | 5                     | 4.7%     | 5                         | 1.7%     |
| <i>PGM5</i>     | 5                     | 4.7%     | 25                        | 8.7%     |
| <i>ZBTB20</i>   | 5                     | 4.7%     | 28                        | 9.7%     |
| <i>IRF2</i>     | 4                     | 3.7%     | 15                        | 5.2%     |
| <i>KDR</i>      | 4                     | 3.7%     | 13                        | 4.5%     |
| <i>LARP4B</i>   | 4                     | 3.7%     | 27                        | 9.3%     |
| <i>MVK</i>      | 4                     | 3.7%     | 13                        | 4.5%     |
| <i>BRAF</i>     | 3                     | 2.8%     | 16                        | 5.5%     |
| <i>PTEN</i>     | 3                     | 2.8%     | 23                        | 8.0%     |
| <i>ACVR1B</i>   | 2                     | 1.9%     | 11                        | 3.8%     |
| <i>CBWD1</i>    | 2                     | 1.9%     | 1                         | 0.3%     |
| <i>FGFR2</i>    | 2                     | 1.9%     | 12                        | 4.2%     |
| <i>JAK2</i>     | 2                     | 1.9%     | 12                        | 4.2%     |
| <i>MEDAG</i>    | 2                     | 1.9%     | 7                         | 2.4%     |
| <i>MLH1</i>     | 2                     | 1.9%     | 6                         | 2.1%     |
| <i>SMAD4</i>    | 2                     | 1.9%     | 24                        | 8.3%     |
| <i>STK11</i>    | 2                     | 1.9%     | 3                         | 1.0%     |
| <i>CD274</i>    | 1                     | 0.9%     | 3                         | 1.0%     |
| <i>MDM2</i>     | 1                     | 0.9%     | 15                        | 5.2%     |
| <i>MYC</i>      | 1                     | 0.9%     | 5                         | 1.7%     |
| <i>C16orf74</i> | 0                     | 0.0%     | 2                         | 0.7%     |
| <i>CCNE1</i>    | 0                     | 0.0%     | 5                         | 1.7%     |
| <i>MET</i>      | 0                     | 0.0%     | 6                         | 2.1%     |
| <i>PDCD1LG2</i> | 0                     | 0.0%     | 1                         | 0.3%     |
